# Supplementary material for: The study of intramolecular decay and intermolecular energy transfer for phosphorescent organic light-emitting devices
Source: Royal Society of Chemistry journal article supplement (doi:10.1039/d1cp00109d), 2021-01-01
Supplement: d1cp00109d1.pdf [file d1cp00109d1.pdf]

## Electronic Supplementary Information

### **The study of intramolecular decay and intermolecular energy transfer for phosphorescent organic light-emitting devices**

Wanlin Cai, Kai Ren, Ancong Zhao, Xiulan Wu, Rongxing He, Ming Li and Wei Shen \*  
Key Laboratory of Luminescence and Real-Time Analytical Chemistry (Southwest University), Ministry of Education, School of Chemistry and Chemical Engineering, Southwest University, Chongqing 400715, China

\*Corresponding author. E-mail: shenw@swu.edu.cn

## MD simulation details

The initial substrates were constructed by randomly placing 300 TAPC molecules. After energy minimization, the system were heated from 0 to 500 K in 5 ns, followed by a 10 ns equilibration at 500 K. The subsequently simulations of these systems were rapid cooling from 500 to 300 K in 200 ps. The finally systems were kept a 10 ns equilibration at 300 K. Then, one PtON7 and 73 26mCPy (approximately 2 wt % of emitter) molecules were deposited within a 2 nm height from the top to the frozen substrate; for another system, one PtOO7 and 64 26mCPy molecules were deposited. After deposition of all molecules, the system was equilibrated at 298 K for 15 ns. Here, the velocity rescaling thermostat and the Berendsen barostat were conducted to control temperature and pressure, respectively. The long range electrostatic interactions performed by the particle-mesh Ewald (PME) method and vdW interactions were computed at a cutoff distance of 1.4 nm.

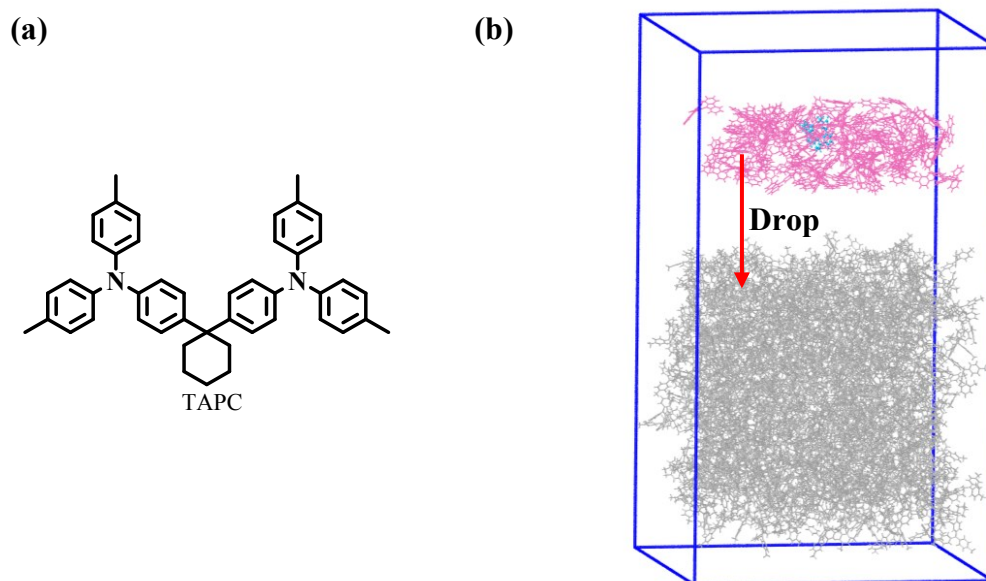

**Figure S1.** (a) Chemical structures of hole-transporting material TAPC. (b) Schematic diagram of vacuum deposition.

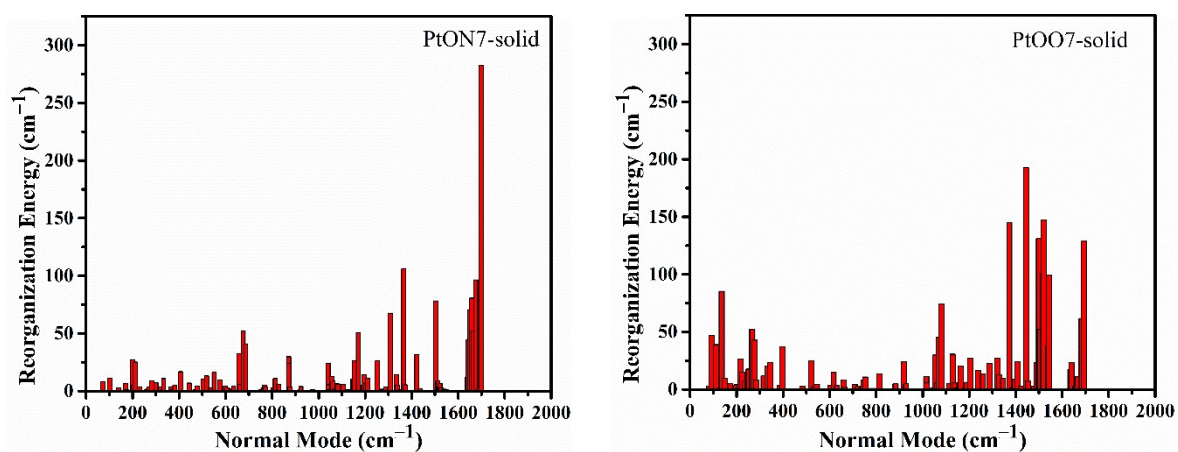

**Figure S2.** The contribution of different normal modes to reorganization energy.

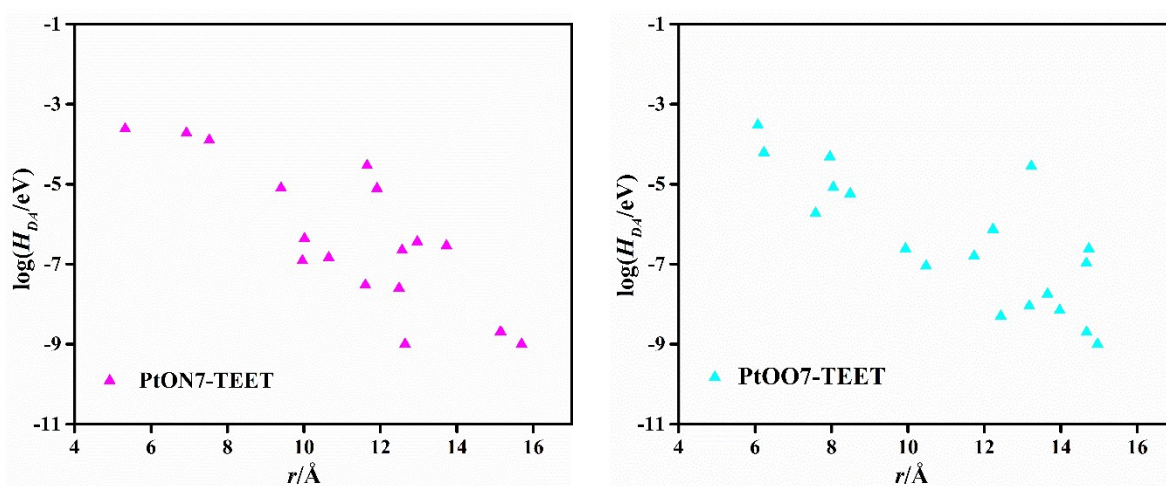

**Figure S3.** Calculated TEET coupling values versus centroid distances.

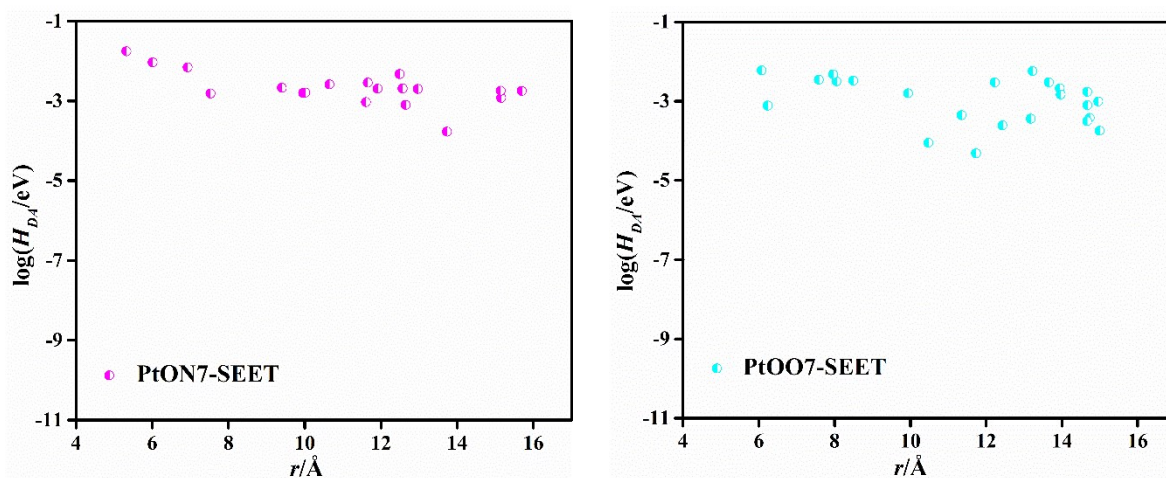

**Figure S4.** Calculated SEET coupling values versus centroid distances.

**Table S1.** Calculated frequency ( $\text{cm}^{-1}$ ), reorganization energy ( $\text{cm}^{-1}$ ) and Huang–Rhys factor of normal modes mainly involved in the vibrationally resolved spectra of PtON7.

| PtON7-solid |          |      |           | PtON7-solution |          |      |           |
|-------------|----------|------|-----------|----------------|----------|------|-----------|
| mode        | $\omega$ | $S$  | $\lambda$ | mode           | $\omega$ | $S$  | $\lambda$ |
| 1           | 73.49    | 0.11 | 8.28      | 1              | 30.16    | 0.14 | 4.33      |
| 4           | 101.77   | 0.11 | 10.91     | 2              | 42.10    | 1.65 | 69.58     |
| 11          | 199.92   | 0.14 | 27.14     | 4              | 75.70    | 0.19 | 14.47     |
| 13          | 212.05   | 0.12 | 25.16     | 5              | 88.95    | 0.12 | 11.07     |
| 45          | 675.86   | 0.08 | 52.36     | 9              | 155.70   | 0.07 | 11.62     |
| 46          | 686.83   | 0.06 | 40.53     | 10             | 165.45   | 0.24 | 40.29     |
| 97          | 1308.84  | 0.05 | 67.6      | 13             | 204.28   | 0.43 | 87.28     |
| 101         | 1366.34  | 0.08 | 105.95    | 19             | 268.17   | 0.07 | 20.09     |
| 113         | 1503.01  | 0.05 | 78.15     | 23             | 329.36   | 0.11 | 36.51     |
| 126         | 1675.73  | 0.06 | 96.52     | 27             | 404.49   | 0.14 | 57.81     |
| 129         | 1699.35  | 0.17 | 282.51    | 30             | 456.60   | 0.25 | 114.09    |
|             |          |      |           | 43             | 653.85   | 0.05 | 34.22     |
|             |          |      |           | 44             | 657.59   | 0.08 | 52.8      |
|             |          |      |           | 97             | 1303.92  | 0.11 | 147.92    |
|             |          |      |           | 114            | 1494.67  | 0.06 | 91.38     |
|             |          |      |           | 128            | 1681.87  | 0.20 | 334.9     |
|             |          |      |           | 129            | 1694.36  | 0.16 | 267.36    |

**Table S2.** Calculated frequency ( $\text{cm}^{-1}$ ), reorganization energy ( $\text{cm}^{-1}$ ) and Huang–Rhys factor of normal modes mainly involved in the vibrationally resolved spectra of PtOO7.

| PtOO7-solid |          |      |           | PtOO7-solution |          |      |           |
|-------------|----------|------|-----------|----------------|----------|------|-----------|
| mode        | $\omega$ | $S$  | $\lambda$ | mode           | $\omega$ | $S$  | $\lambda$ |
| 2           | 93.38    | 0.50 | 46.79     | 2              | 42.52    | 0.83 | 35.11     |
| 3           | 111.71   | 0.35 | 38.93     | 3              | 48.20    | 1.39 | 66.79     |
| 5           | 136.41   | 0.62 | 85.21     | 5              | 90.28    | 0.13 | 11.76     |
| 6           | 148.11   | 0.06 | 9.51      | 6              | 106.33   | 0.69 | 73.41     |
| 10          | 217.36   | 0.12 | 26.53     | 7              | 148.85   | 0.18 | 26.78     |
| 11          | 225.82   | 0.07 | 15.08     | 8              | 171.24   | 0.06 | 10.65     |
| 14          | 252.80   | 0.07 | 17.63     | 9              | 174.84   | 0.07 | 11.57     |
| 15          | 267.78   | 0.20 | 52.49     | 10             | 189.19   | 0.06 | 11.69     |
| 16          | 277.88   | 0.15 | 42.85     | 14             | 241.35   | 0.16 | 38.65     |
| 19          | 333.04   | 0.06 | 20.46     | 15             | 253.93   | 0.31 | 77.77     |
| 20          | 345.65   | 0.07 | 23.48     | 19             | 319.57   | 0.13 | 41.83     |
| 23          | 397.96   | 0.09 | 36.99     | 23             | 395.32   | 0.10 | 40.89     |
| 65          | 1080.84  | 0.07 | 74.21     | 64             | 1067.98  | 0.06 | 59.59     |
| 83          | 1372.71  | 0.11 | 144.88    | 65             | 1077.86  | 0.06 | 60.99     |
| 88          | 1444.99  | 0.13 | 192.54    | 83             | 1362.06  | 0.15 | 198.31    |
| 93          | 1500.08  | 0.09 | 131.2     | 88             | 1435.80  | 0.17 | 237.64    |
| 95          | 1516.99  | 0.07 | 101.07    | 94             | 1495.53  | 0.08 | 127.06    |
| 96          | 1521.56  | 0.10 | 147.47    | 95             | 1508.75  | 0.15 | 231.52    |
| 98          | 1543.92  | 0.06 | 99.41     | 98             | 1533.86  | 0.13 | 192.41    |
| 105         | 1694.64  | 0.08 | 128.68    | 104            | 1678.43  | 0.06 | 105.63    |
|             |          |      |           | 106            | 3092.99  | 0.08 | 236.9     |

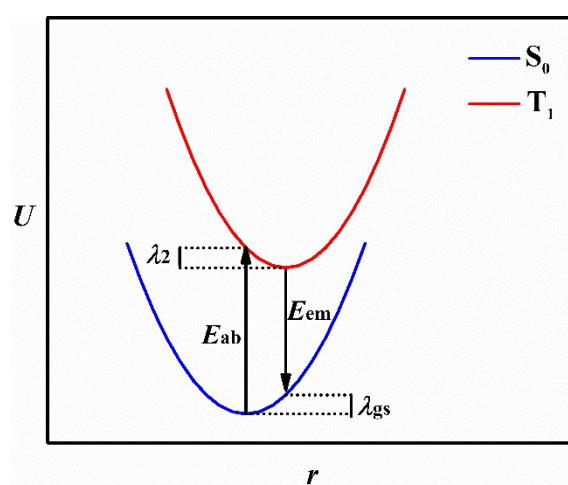

**Figure S5.** The adiabatic potential energy surfaces of  $T_1$  and  $S_0$  for emitters. Here,  $\lambda_{\text{gs/es}}$  is the reorganization energy of  $S_0/T_1$ .

**Table S3.** Calculated reorganization energy  $\lambda_{gs}$  and  $\lambda_2$  (see Figure S5).

|       | Solution                 |                       | Solid                    |                       |
|-------|--------------------------|-----------------------|--------------------------|-----------------------|
|       | $\lambda_{gs}/\text{eV}$ | $\lambda_2/\text{eV}$ | $\lambda_{gs}/\text{eV}$ | $\lambda_2/\text{eV}$ |
| PtON7 | 0.283                    | 0.209                 | 0.211                    | 0.178                 |
| PtOO7 | 0.292                    | 0.232                 | 0.266                    | 0.241                 |

<sup>a</sup>  $\lambda_{gs}$  and  $\lambda_2$  were calculated by the four-point technique.
